# Supplementary material for: Transcriptomic and Widely Targeted Metabolomic Approach Identified Diverse Group of Bioactive Compounds, Antiradical Activities, and Their Associated Genes in Six Sugarcane Varieties
Source: MDPI journal article supplement (doi:10.3390/antiox11071319), 2022-07-04
Supplement: s1 [file s1]

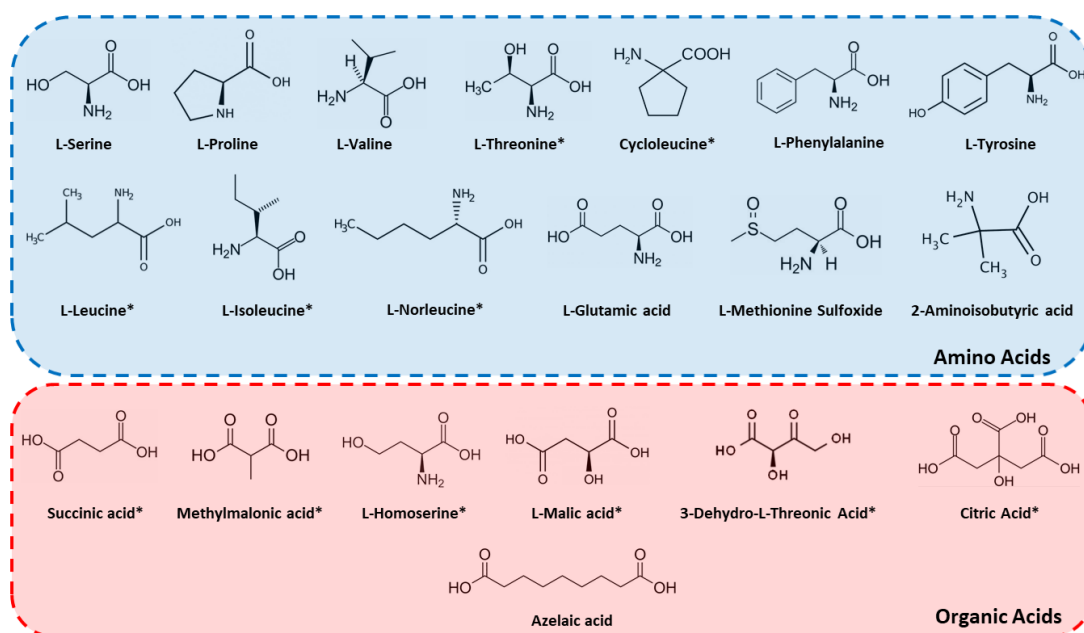

**Figure S1** Chemical structure of major amino acids and organic acid in sugarcane.

### Internal standard, quality control, and mass spectrometry details:

We have performed a wide-target, high-throughput test, using a relatively quantitative method, we have used internal standard for quality control, adding internal standard in the extraction agent, the purpose is: to calibrate and eliminate the impact of fluctuations in operating conditions on the analysis results, to improve the accuracy of the analysis results. According to the detection of internal standard substances in the sample, such as whether the peak, whether the fluctuation range is too large, so as to judge whether the detection results of metabolites in the sample is stable; About the quality control standard: CV value is the Coefficient of Variation, which is the ratio between the standard deviation of the original data and the mean of the original data, and can reflect the degree of data dispersion. The Empirical Cumulative Distribution Function (ECDF) can be used to analyze the occurrence frequency of CV of substances smaller than the reference value. The higher the proportion of substances with lower CV value in QC samples, the more stable the experimental data.

Every step in the project testing process is equipped with quality control procedures to ensure the stability of experimental operation and testing instrument. Our testing instrument is stable, and the quality control standard is reflected by the CV value of internal standard. The CV value of internal standard data of all samples of the project is in full compliance with the delivery standard. In the delivery data of the project, materials with CV value below 30% of mix samples account for more than 95%, which is in line with the standard. Materials with CV value below 50% as stipulated by the company are deliverable

Under internal standard CV value:

Mws0923 8.645759%, Internal standard information.

High resolution mass spectrometry AB SCIEX 6600 QTOF was used for qualitative detection of mixed samples, which can detect mass to charge ratio to four decimal points to improve qualitative accuracy. Then, AB SciEX 4500 QTRAP was used for quantitative analysis, combining the advantages of untargeted and targeted metabolomics. High resolution mass spectrometry was used for accurate characterization, and triple quadrupole mass spectrometry with high sensitivity, high specificity and excellent quantitative ability was used as a supplementary tool. Matched parameters for metabolite identification include Q1 exact molecular mass, secondary fragmentation, retention time, and isotope.

**Table S1** The amino acid and organic acid details quantified in this study.

| Serial No. | Amino acid & derivatives Compounds       | Formula   | Ionization model   | Molecular Weight (Da) | CAS        | Q1 (Da) | Q3 (Da) |
|------------|------------------------------------------|-----------|--------------------|-----------------------|------------|---------|---------|
| 1          | Glycine                                  | C2H5NO2   | [M+H] <sup>+</sup> | 75.032                | 56-40-6    | 76.04   | 29.99   |
| 2          | N,N-Dimethylglycine                      | C4H9NO2   | [M+H] <sup>+</sup> | 103.063               | 1118-68-9  | 104.07  | 86      |
| 3          | 2-Aminoisobutyric acid                   | C4H9NO2   | [M+H] <sup>+</sup> | 103.063               | 62-57-7    | 104.07  | 58      |
| 4          | Serine                                   | C3H7NO3   | [M+H] <sup>+</sup> | 105.043               | 56-45-1    | 106     | 60      |
| 5          | Histamine                                | C5H9N3    | [M+H] <sup>+</sup> | 111.08                | 51-45-6    | 112.09  | 95      |
| 6          | Proline                                  | C5H9NO2   | [M+H] <sup>+</sup> | 115.063               | 147-85-3   | 116.07  | 70.1    |
| 7          | Valine                                   | C5H11NO2  | [M+H] <sup>+</sup> | 117.079               | 72-18-4    | 118.09  | 72.1    |
| 8          | Threonine*                               | C4H9NO3   | [M+H] <sup>+</sup> | 119.058               | 72-19-5    | 120.07  | 74      |
| 9          | Cycloleucine*                            | C6H11NO2  | [M+H] <sup>+</sup> | 129.079               | 52-52-8    | 130.09  | 84.08   |
| 10         | Pipecolic acid*                          | C6H11NO2  | [M+H] <sup>+</sup> | 129.079               | 4043-87-2  | 130.09  | 84.08   |
| 11         | N-Propionylglycine                       | C5H9NO3   | [M-H] <sup>-</sup> | 131.058               | 21709-90-0 | 130.05  | 86      |
| 12         | Trans-4-Hydroxy-proline                  | C5H9NO3   | [M+H] <sup>+</sup> | 131.058               | 51-35-4    | 132.07  | 86      |
| 13         | Leucine*                                 | C6H13NO2  | [M+H] <sup>+</sup> | 131.095               | 61-90-5    | 132.1   | 86.2    |
| 14         | Isoleucine*                              | C6H13NO2  | [M+H] <sup>+</sup> | 131.095               | 73-32-5    | 132.1   | 86      |
| 15         | Norleucine*                              | C6H13NO2  | [M+H] <sup>+</sup> | 131.095               | 327-57-1   | 132.1   | 86      |
| 16         | Asparagine                               | C4H8N2O3  | [M+H] <sup>+</sup> | 132.054               | 70-47-3    | 133.06  | 74      |
| 17         | Ornithine                                | C5H12N2O2 | [M+H] <sup>+</sup> | 132.09                | 70-26-8    | 133     | 116     |
| 18         | Aspartic Acid                            | C4H7NO4   | [M-H] <sup>-</sup> | 133.038               | 56-84-8    | 132.03  | 88      |
| 19         | 1-Methylpiperidine-2-carboxylic acid     | C7H13NO2  | [M+H] <sup>+</sup> | 143.095               | 7730-87-2  | 144.1   | 84.08   |
| 20         | Glutamine                                | C5H10N2O3 | [M+H] <sup>+</sup> | 146.069               | 56-85-9    | 147.08  | 84      |
| 21         | Lysine                                   | C6H14N2O2 | [M+H] <sup>+</sup> | 146.106               | 56-87-1    | 147.11  | 84      |
| 22         | O-Acetylserine                           | C5H9NO4   | [M+H] <sup>+</sup> | 147.053               | 5147-00-2  | 148.06  | 88      |
| 23         | Glutamic acid                            | C5H9NO4   | [M+H] <sup>+</sup> | 147.053               | 56-86-0    | 148.06  | 84      |
| 24         | threo-3-Methylaspartate                  | C5H9NO4   | [M-H] <sup>-</sup> | 147.053               | 6061-13-8  | 146.05  | 102.06  |
| 25         | Methionine                               | C5H11NO2S | [M+H] <sup>+</sup> | 149.051               | 63-68-3    | 150.06  | 61      |
| 26         | Histidine                                | C6H9N3O2  | [M+H] <sup>+</sup> | 155.069               | 71-00-1    | 156.08  | 110     |
| 27         | 3-Hydroxy-3-methylpentane-1,5-dioic acid | C6H10O5   | [M-H] <sup>-</sup> | 162.053               | 503-49-1   | 161.05  | 99      |
| 28         | Homomethionine                           | C6H13NO2S | [M+H] <sup>+</sup> | 163.067               | 25148-30-5 | 164.07  | 56.05   |
| 29         | Methionine methyl ester                  | C6H13NO2S | [M+H] <sup>+</sup> | 163.067               | 10332-17-9 | 164.07  | 104     |
| 30         | Methionine Sulfoxide                     | C5H11NO3S | [M+H] <sup>+</sup> | 165.046               | 3226-65-1  | 166.05  | 102     |
| 31         | Phenylalanine                            | C9H11NO2  | [M+H] <sup>+</sup> | 165.07                | 63-91-2    | 166.09  | 120.08  |
| 32         | N- $\alpha$ -Acetyl-ornithine            | C7H14N2O3 | [M-H] <sup>-</sup> | 174.1                 | 6205-08-9  | 173.11  | 131.08  |

|    |                             |               |                    |         |            |        |        |
|----|-----------------------------|---------------|--------------------|---------|------------|--------|--------|
| 33 | Arginine                    | C6H14N4O2     | [M+H] <sup>+</sup> | 174.112 | 74-79-3    | 175.12 | 116    |
| 34 | Citrulline                  | C6H13N3O3     | [M+H] <sup>+</sup> | 175.096 | 372-75-8   | 176.1  | 113    |
| 35 | Tyrosine                    | C9H11NO3      | [M+H] <sup>+</sup> | 181.074 | 60-18-4    | 182.08 | 136.1  |
| 36 | Cyclo(Ser-Pro)              | C8H12N2O3     | [M+H] <sup>+</sup> | 184.086 | -          | 185.09 | 70.06  |
| 37 | N-Acetyl-Glutamine          | C7H12N2O4     | [M-H] <sup>-</sup> | 188.08  | 2490-97-3  | 187.07 | 125    |
| 38 | Glycyl-isoleucine*          | C8H16N2O3     | [M+H] <sup>+</sup> | 188.116 | 19461-38-2 | 189.12 | 86.1   |
| 39 | N-Glycyl-leucine*           | C8H16N2O3     | [M+H] <sup>+</sup> | 188.116 | 869-19-2   | 189.12 | 86     |
| 40 | N6-Acetyl-lysine            | C8H16N2O3     | [M+H] <sup>+</sup> | 188.116 | 692-04-6   | 189.12 | 126    |
| 41 | Homoarginine                | C7H16N4O2     | [M+H] <sup>+</sup> | 188.127 | 156-86-5   | 189.13 | 144    |
| 42 | N-Monomethyl-arginine       | C7H16N4O2     | [M+H] <sup>+</sup> | 188.127 | 17035-90-4 | 189.13 | 70.07  |
| 43 | 2,6-Diaminoimelic acid      | C7H14N2O4     | [M+H] <sup>+</sup> | 190.095 | 583-93-7   | 191.1  | 128    |
| 44 | N-Phenylacetyl-glycine      | C10H11NO3     | [M+H] <sup>+</sup> | 193.074 | 500-98-1   | 194.08 | 91     |
| 45 | Alanyl-leucine              | C9H18N2O3     | [M+H] <sup>+</sup> | 202.132 | 3303-34-2  | 203.14 | 86.1   |
| 46 | NG,NG-Dimethyl-arginine     | C8H18N4O2     | [M+H] <sup>+</sup> | 202.143 | 30315-93-6 | 203.15 | 70.07  |
| 47 | Tryptophan                  | C11H12N2O2    | [M-H] <sup>-</sup> | 204.09  | 73-22-3    | 203.08 | 116.05 |
| 48 | N-Acetyl-phenylalanine      | C11H13NO3     | [M-H] <sup>-</sup> | 207.09  | 2018-61-3  | 206.08 | 58.03  |
| 49 | 3-(2-Naphthyl)-L-alanine    | C13H13NO2     | [M-H] <sup>-</sup> | 215.095 | 58438-03-2 | 214.1  | 134    |
| 50 | N-Acetyl-Arginine           | C8H16N4O3     | [M+H] <sup>+</sup> | 216.122 | 155-84-0   | 217.13 | 158    |
| 51 | 5-Glutamyl-amino acid       | C8H14N2O5     | [M-H] <sup>-</sup> | 218.09  | 5875-41-2  | 217.08 | 199    |
| 52 | Seryl-Isoleucine            | C9H18N2O4     | [M+H] <sup>+</sup> | 218.127 | 91086-51-0 | 219.13 | 60.04  |
| 53 | 5-Hydroxy-tryptophan        | C11H12N2O3    | [M+H] <sup>+</sup> | 220.085 | 56-69-9    | 221.09 | 204    |
| 54 | Glycyl-phenylalanine        | C11H14N2O3    | [M+H] <sup>+</sup> | 222.1   | 721-66-4   | 223.11 | 120.09 |
| 55 | Prolyl-Leucine              | C11H20N2O3    | [M+H] <sup>+</sup> | 229.154 | 52899-07-7 | 229.15 | 70.07  |
| 56 | Valyl-Leucine               | C11H22N2O3    | [M+H] <sup>+</sup> | 231.17  | 3989-97-7  | 231.16 | 72.08  |
| 57 | Lysine-Butanoic Acid        | C10H22N2O4    | [M+H] <sup>+</sup> | 234.158 | 80407-71-2 | 235.1  | 118.3  |
| 58 | Alanyl-Phenylalanine        | C12H16N2O3    | [M+H] <sup>+</sup> | 236.116 | 3061-90-3  | 237.12 | 120.09 |
| 59 | Cyclo(Pro-Phe)              | C14H16N2O2    | [M+H] <sup>+</sup> | 245.128 | 3705-26-8  | 245.12 | 120.08 |
| 60 | Leucyl-Leucine              | C12H24N2O3    | [M+H] <sup>+</sup> | 245.186 | 3303-31-9  | 245.18 | 86.1   |
| 61 | Prolyl-Phenylalanine        | C14H18N2O3    | [M+H] <sup>+</sup> | 263.139 | 13589-02-1 | 263.13 | 70.07  |
| 62 | Valyl-Phenylalanine         | C14H20N2O3    | [M+H] <sup>+</sup> | 264.147 | 3918-92-1  | 265.15 | 72.08  |
| 63 | S-Ribosyl-homocysteine      | C9H17NO6S     | [M-H] <sup>-</sup> | 267.078 | -          | 266.09 | 134.05 |
| 64 | Homocystine                 | C8H16N2O4S2   | [M+H] <sup>+</sup> | 268.055 | 626-72-2   | 269.06 | 136    |
| 65 | Leucyl-phenylalanine        | C15H22N2O3    | [M+H] <sup>+</sup> | 278.163 | 56217-82-4 | 279.17 | 120.08 |
| 66 | Aspartyl-Phenylalanine      | C13H16N2O5    | [M+H] <sup>+</sup> | 280.106 | 13433-09-5 | 281.11 | 166    |
| 67 | Nicotianamine               | C12H21N3O6    | [M+H] <sup>+</sup> | 303.143 | 34441-14-0 | 304.15 | 185.09 |
| 68 | Glutamic acid-O-glycoside   | C11H19NO9     | [M-H] <sup>-</sup> | 309.106 | -          | 308.1  | 146.1  |
| 69 | S-(Methyl)glutathione       | C11H19N3O6S   | [M+H] <sup>+</sup> | 321.099 | 2922-56-7  | 322.11 | 130    |
| 70 | S-Adenosyl-methionine       | C15H22N6O5S   | [M+H] <sup>+</sup> | 398.137 | 29908-03-0 | 399.2  | 250    |
| 71 | Aspartic acid-O-diglucoside | C16H27NO14    | [M+H] <sup>+</sup> | 457.143 | -          | 458.1  | 116.3  |
| 72 | Oxiglutatione               | C20H32N6O12S2 | [M-H] <sup>-</sup> | 612.152 | 27025-41-8 | 611.14 | 306.08 |
| 73 | Succinic anhydride          |               |                    |         |            |        |        |
|    | l-Aminocyclopropane-1-      |               |                    |         |            |        |        |
|    | carboxylic acid             | C4H4O3        | [M+H] <sup>+</sup> | 100.018 | 108-30-5   | 101.02 | 55.02  |
| 74 | γ-Aminobutyric acid         | C4H7NO2       | [M+H] <sup>+</sup> | 101.048 | 22059-21-8 | 102.05 | 56.05  |
| 75 | Hydroxypyruvic acid*        | C4H9NO2       | [M+H] <sup>+</sup> | 103.063 | 56-12-2    | 104.07 | 68.8   |
| 76 | Tartronic semialdehyde*     | C3H4O4        | [M-H] <sup>-</sup> | 104.011 | 1113-60-6  | 103    | 59.01  |
| 77 | Fumaric acid                | C3H4O4        | [M-H] <sup>-</sup> | 104.011 | 2480-77-5  | 103    | 59.01  |
| 78 | Erythrulactone              | C4H4O4        | [M-H] <sup>-</sup> | 116.011 | 110-17-8   | 115    | 71     |
| 79 | Succinic acid*              | C4H6O4        | [M-H] <sup>-</sup> | 118.027 | 15667-21-7 | 117    | 59     |

|     |                                          |           |        |         |             |        |        |
|-----|------------------------------------------|-----------|--------|---------|-------------|--------|--------|
| 80  | Methylmalonic acid*                      | C4H6O4    | [M-H]- | 118.027 | 110-15-6    | 117.02 | 73     |
| 81  | β-Hydroxyisovaleric acid                 | C4H6O4    | [M-H]- | 118.027 | 516-05-2    | 117.02 | 73     |
| 82  | Aminomalonic acid                        | C5H10O3   | [M-H]- | 118.063 | 625-08-1    | 117.06 | 59     |
| 83  | Homoserine*                              | C3H5NO4   | [M-H]- | 119.022 | 1068-84-4   | 118    | 74     |
| 84  | Isonicotinic acid*                       | C4H9NO3   | [M+H]+ | 119.058 | 672-15-1    | 120.07 | 74.1   |
| 85  | 2-Hydroxyethylphosphonic acid            | C6H5NO2   | [M+H]+ | 123.032 | 55-22-1     | 124.04 | 78.03  |
| 86  | Methylenesuccinic acid                   | C2H7O4P   | [M-H]- | 126.008 | 22987-21-9  | 125    | 78.96  |
| 87  | 2-Methylsuccinic acid*                   | C5H6O4    | [M-H]- | 130.027 | 97-65-4     | 129.02 | 85.03  |
| 88  | Glutaric acid*                           | C5H8O4    | [M-H]- | 132.042 | 498-21-5    | 131.03 | 87.05  |
| 89  | 3-Ureidopropionic Acid                   | C5H8O4    | [M-H]- | 132.042 | 110-94-1    | 131.03 | 87.05  |
| 90  | Malic acid*                              | C4H8N2O3  | [M-H]- | 132.053 | 462-88-4    | 131.05 | 70.03  |
| 91  | 3-Dehydro-L-Threonic Acid*               | C4H6O5    | [M-H]- | 134.022 | 97-67-6     | 133.01 | 71.01  |
| 92  | 3-Hydroxybenzoic Acid                    | C4H6O5    | [M-H]- | 134.022 | -           | 133.01 | 71.01  |
| 93  | Muconic acid                             | C7H6O3    | [M-H]- | 138.032 | 99-06-9     | 137.02 | 93.03  |
| 94  | 4-Acetamidobutyric acid                  | C6H6O4    | [M-H]- | 142.027 | 1119-72-8   | 141.02 | 59     |
| 95  | 4-Guanidinobutyric acid                  | C6H11NO3  | [M+H]+ | 145.074 | 3025-96-5   | 146.08 | 86     |
| 96  | 2-Methyl-3-oxosuccinic acid              | C5H11N3O2 | [M+H]+ | 145.085 | 463-00-3    | 146.09 | 87     |
| 97  | α-Ketoglutaric acid                      | C5H6O5    | [M-H]- | 146.022 | -           | 145.01 | 57.03  |
| 98  | Adipic Acid                              | C5H6O5    | [M-H]- | 146.022 | 328-50-7    | 145.01 | 101    |
| 99  | 2-Acetyl-2-Hydroxybutanoic Acid          | C6H10O4   | [M-H]- | 146.058 | 124-04-9    | 145.05 | 101    |
| 100 | 3-Methylmalic acid*                      | C6H10O4   | [M-H]- | 146.058 | -           | 145.05 | 83.05  |
| 101 | Citramalic acid*                         | C5H8O5    | [M-H]- | 148.037 | 152204-30-3 | 147.03 | 57.03  |
| 102 | 2-Hydroxyglutaric Acid*                  | C5H8O5    | [M-H]- | 148.037 | 6236-09-5   | 147.03 | 87.1   |
| 103 | Benzyl acetate                           | C5H8O5    | [M-H]- | 148.037 | 13095-48-2  | 147.03 | 57.03  |
| 104 | 2,3-Dihydroxybenzoic Acid*               | C9H10O2   | [M-H]- | 150.068 | 140-11-4    | 149.06 | 74.9   |
| 105 | 5-Acetamidopentanoic Acid                | C7H6O4    | [M-H]- | 154.027 | 303-38-8    | 153.02 | 109.03 |
| 106 | 2-Oxoadipic acid                         | C7H13NO3  | [M-H]- | 159.09  | 1072-10-2   | 158.08 | 116.07 |
| 107 | 4-Hydroxy-2-oxoglutaric acid             | C6H8O5    | [M-H]- | 160.037 | 3184-35-8   | 159.1  | 87     |
| 108 | 2-Hydroxycinnamic acid*                  | C5H6O6    | [M-H]- | 162.016 | 1187-99-1   | 161    | 73     |
| 109 | Phthalic acid                            | C9H8O3    | [M-H]- | 164.047 | 583-17-5    | 163.04 | 119.05 |
| 110 | Xylonic acid                             | C8H6O4    | [M-H]- | 166.027 | 88-99-3     | 165.02 | 77.04  |
| 111 | 1-Naphthoic acid                         | C5H10O6   | [M-H]- | 166.048 | 526-91-0    | 165.04 | 75     |
| 112 | 9-Oxononanoic acid                       | C11H8O2   | [M-H]- | 172.052 | 86-55-5     | 171.04 | 127.05 |
| 113 | Cis-Aconitic acid                        | C9H16O3   | [M-H]- | 172.11  | 2553-17-5   | 171.1  | 99.08  |
| 114 | Shikimic acid                            | C6H6O6    | [M-H]- | 174.016 | 585-84-2    | 173.02 | 137    |
| 115 | 2-Propylglutaric acid                    | C7H10O5   | [M-H]- | 174.053 | 138-59-0    | 173.05 | 93     |
| 116 | Suberic Acid                             | C8H14O4   | [M-H]- | 174.089 | 32806-62-5  | 173.08 | 59.01  |
| 117 | 4,5,6-Trihydroxy-2-oxohexanoic acid      | C8H14O4   | [M-H]- | 174.089 | 505-48-6    | 173.08 | 111    |
| 118 | Azelaic acid                             | C6H10O6   | [M-H]- | 178.048 | 56742-44-0  | 177.04 | 113.02 |
| 119 | Isocitric Acid*                          | C9H16O4   | [M-H]- | 188.105 | 123-99-9    | 187.1  | 125    |
| 120 | Citric Acid*                             | C6H8O7    | [M-H]- | 192.027 | 320-77-4    | 191.02 | 111.01 |
| 121 | Galacturonic acid*                       | C6H8O7    | [M-H]- | 192.027 | 77-92-9     | 191.02 | 111.01 |
| 122 | 4,8-Dihydroxyquinoline-2-carboxylic acid | C6H10O7   | [M-H]- | 194.033 | 685-73-4    | 193.04 | 72.8   |
| 123 | Dodecanedioic acid                       | C10H7NO4  | [M-H]- | 205.038 | 59-00-7     | 204.03 | 160.04 |
| 124 | Absciscic acid                           | C12H22O4  | [M-H]- | 230.152 | 693-23-2    | 229.14 | 211    |

|     |                            |            |        |         |            |        |        |
|-----|----------------------------|------------|--------|---------|------------|--------|--------|
| 125 | 2-Hydroxyhexadecanoic acid | C15H20O4   | [M-H]- | 264.136 | 21293-29-8 | 263.13 | 204.12 |
| 126 | Phytic acid                | C16H32O3   | [M-H]- | 272.235 | 764-67-0   | 271.23 | 225.22 |
| 127 | Glycine                    | C6H18O24P6 | [M-H]- | 659.861 | 83-86-3    | 658.85 | 482.93 |

---

\*means isomers
